# Supplementary material for: Two dye-encapsulated triple-emitting naphthalene-based Zr-MOFs for tunable white-light emission and dual mode detection of inorganic ions
Source: Royal Society of Chemistry journal article supplement (doi:10.1039/d3tc04432g), 2024-01-01
Supplement: d3tc04432g1.pdf [file d3tc04432g1.pdf]

# Electronic Supplementary Information

## **Two dyes-encapsulated triple-emitting naphthalene-based Zr-MOFs for tunable white-light emission and dual mode detection of inorganic ions**

Yang Chen<sup>a</sup>, Guang Yang<sup>a</sup>, Xin Liu<sup>c</sup>, Dashu Chen<sup>a,\*</sup>, Hongzhu Xing<sup>c</sup>, and Liu Yang<sup>b,\*</sup>

<sup>a</sup>College of Chemistry, Chemical Engineering and Resource Utilization, Northeast Forestry University, No. 26 Hexing Road, Harbin, 150040, China

<sup>b</sup>Department of Chemistry, College of Arts and Sciences, Northeast Agricultural University, No. 600 Changjiang Road, Harbin, 150030, China

<sup>c</sup>Provincial Key Laboratory of Advanced Energy Materials, College of Chemistry, Northeast Normal University, No. 5268 Renmin Street, Changchun, 130024, China

E-mail address: chends410@nenu.edu.cn, yangliu@neau.edu.cn.

## **Chemicals and Instruments.**

Zirconium(IV) chloride ( $ZrCl_4$ , 98%) and 2,6-naphthalenedicarboxylic acid ( $H_2NDC$ ) were purchased from Aladdin and TCI, and rhodamine 6G (Rh6G) and 9,10-bis(phenylethynyl)anthracene (BPEA, 97%) were purchased from Rhawn and Innochem. N,N-dimethylformamide (DMF) and anhydrous ethanol ( $C_2H_6O$ ) were purchased from Fuyu. Acetic acid ( $C_2H_4O_2$ , 99.5% ) was purchased from Innochem. All inorganic metal salts were purchased from Kermel. All commercial chemicals were analytical purity and used without further purification. The UV-vis absorption spectra of liquid samples were obtained by TU-1901 UV-vis spectrophotometer. Powder X-ray diffraction (PXRD) measurements were obtained from the TD-3500 diffractometer with a  $2\theta$  range from  $3^\circ$  to  $40^\circ$  at a scan speed of  $5^\circ \text{ min}^{-1}$ . The fluorescence spectra were acquired at room temperature using the Shimadzu RF-6000 fluorescence spectrophotometer. Fluorescence lifetime were determined by the Quanta Master 8000 fluorescence spectrometer at room temperature. Thermogravimetric analysis (TGA) data were acquired from the PerkinElmer TGA-8000 thermogravimetric analyzer over a temperature range of room temperature to  $800^\circ\text{C}$ . The morphology of samples was characterized by EM-30Plus benchtop scanning electron microscopy.  $N_2$  sorption measurements were measured at the liquid nitrogen temperature, using a Micromeritics ASAP 2020 system.

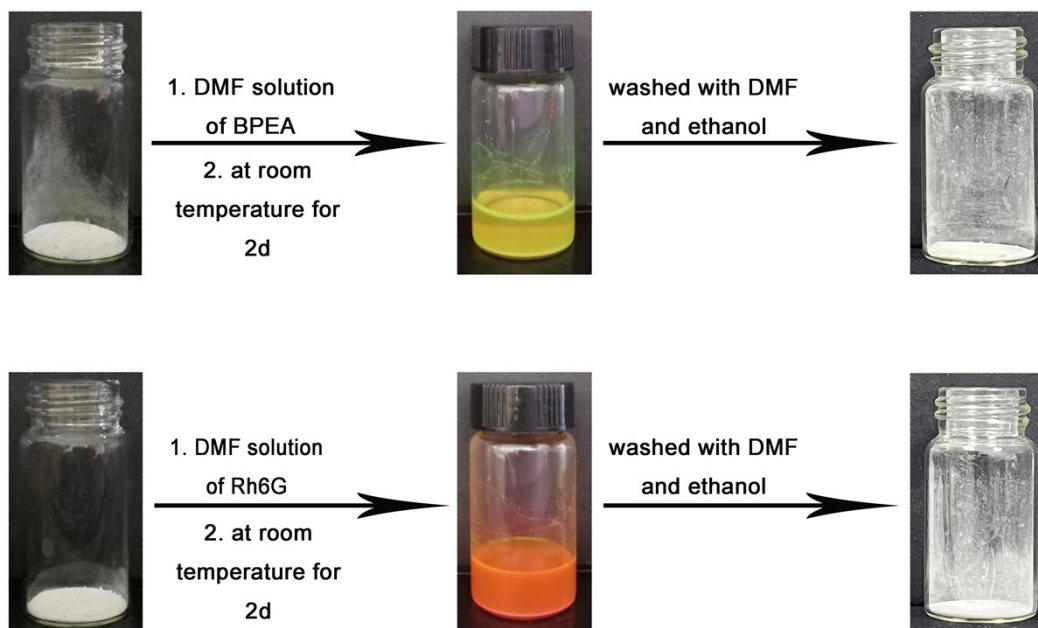

**Fig. S1** The pristine DUT-52 before and after soaked in 4 mL BPEA and Rh6G solution ( $6.275 \text{ mg mL}^{-1}$  and  $11.9 \text{ mg mL}^{-1}$ , DMF solvent) at room temperature, respectively.

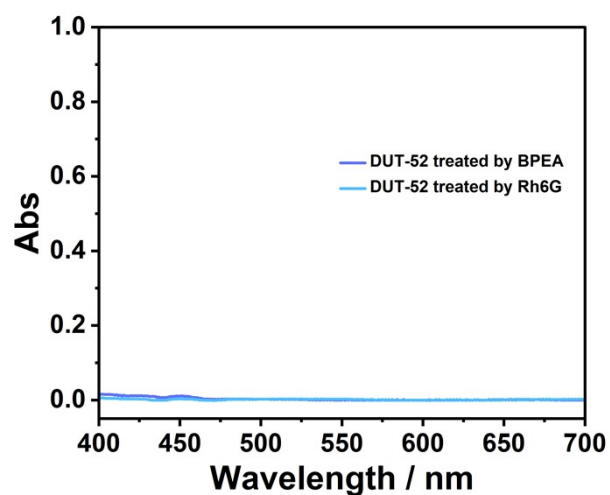

**Fig. S2** The UV-vis absorption spectra of decomposition solution of dut-52 treated by BPEA/Rh6G.

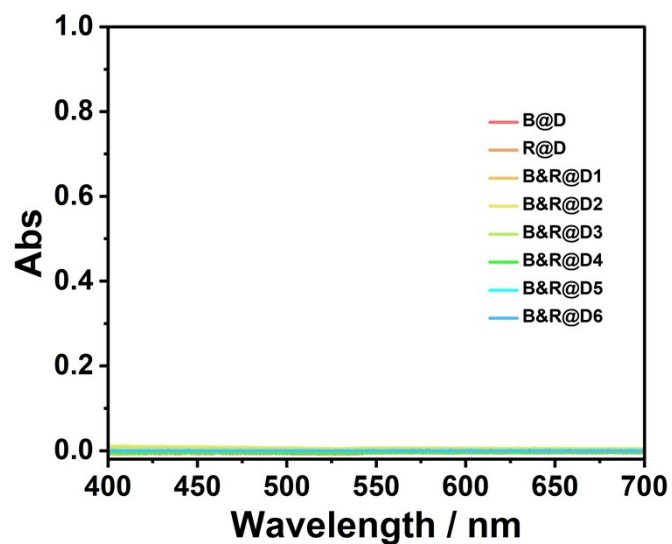

**Fig. S3** The UV-vis absorption spectra of the supernatant of soaked DUT-52, B@D, R@D, and six B&R@D composites DMF solution (8 mL, 48 h).

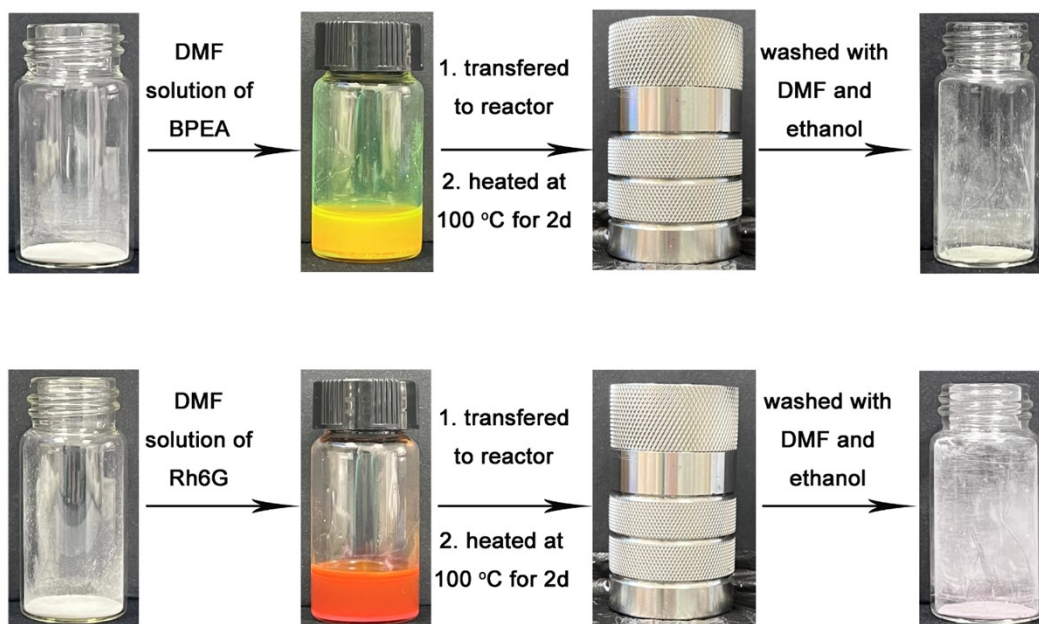

**Fig. S4** The pristine DUT-52 before and after reacted with BPEA and Rh6G solution ( $6.275 \text{ mg mL}^{-1}$  and  $11.9 \text{ mg mL}^{-1}$ , DMF solvent) at  $100 \text{ }^\circ\text{C}$ , respectively.

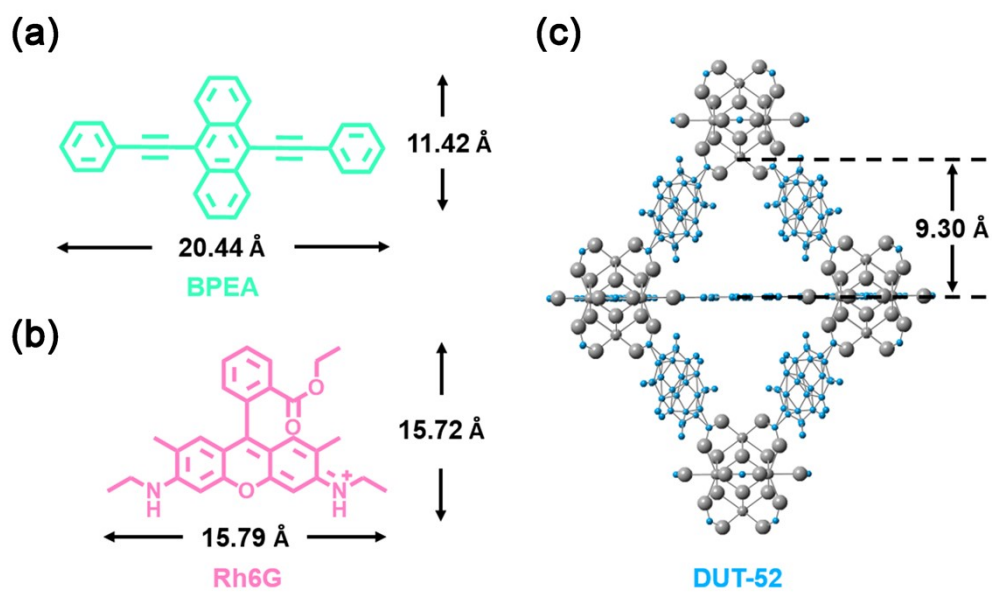

**Fig. S5** (a, b) Chemical structures and molecular sizes of 9,10-bis(phenylethynyl)anthracene (BPEA) and rhodamine 6G (Rh6G). (c) Window size of DUT-52 with *fcu* topology.

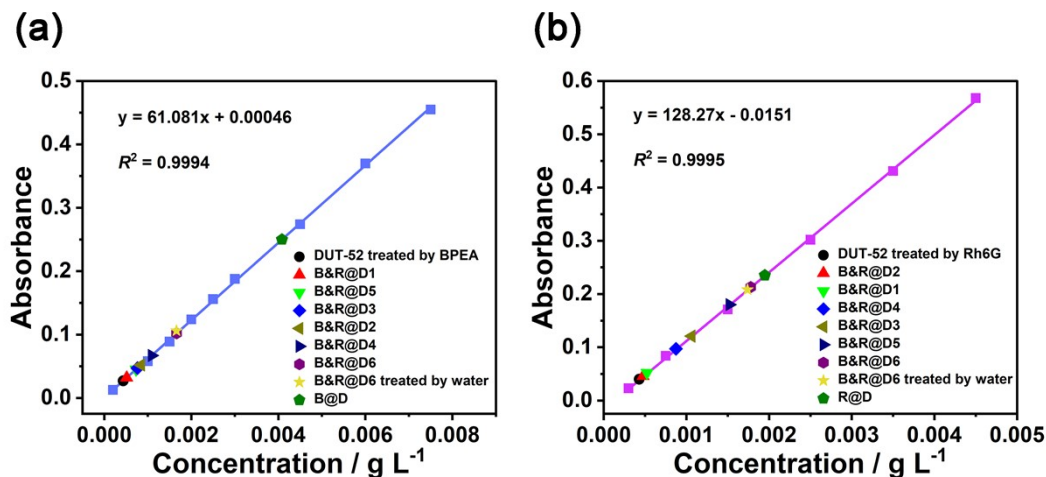

**Fig. S6** (a) The standard absorbance curve of BPEA acidic solution (square) and the absorbance of acidic hydrolysis solution for BPEA&Rh6G@DUT-52 composites and DUT-52 in control experiments (solvothelmal treatment by BPEA solution) (other shaped points). (b) The standard absorbance curve of Rh6G acidic solution (square) and the absorbance of acidic hydrolysis solution for BPEA&Rh6G@DUT-52 composites and DUT-52 in control experiments (solvothelmal treatment by Rh6G solution) (other shaped points).

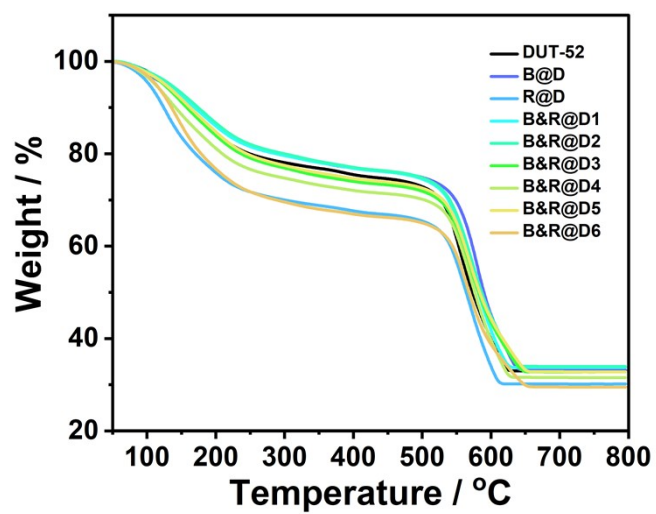

**Fig. S7** The TG curves of as-synthesized DUT-52, BPEA@DUT-52, Rh6G@DUT-52 and six BPEA&Rh6G@DUT-52 composites.

**The acidic hydrolysis procedure of BPEA&Rh6G@DUT-52 composites or DUT-52 in control experiments.**

15 mg BPEA&Rh6G@DUT-52 composites or DUT-52 in control experiments were dispersed in 5 mL acidic solution of DMF ( $V_{\text{DMF}} : V_{\text{HCl}} = 4 : 1$ ) and heated at 60 °C for 2 hours to completely hydrolyse MOF composites and release BPEA and Rh6G molecules. The concentrations of BPEA and Rh6G solutions of acidic hydrolysis solutions were calculated by the standard curves of BPEA and Rh6G ( $y = 61.081x - 0.00046$ ,  $y = 128.27x - 0.0151$ ), respectively. The loaded mole fractions of BPEA and Rh6G in samples are represented as  $X_{\text{BPEA}}$  and  $X_{\text{Rh6G}}$ .

**Table S1** The loaded mole fractions of BPEA and Rh6G in different samples

| Samples                                  | B&R@D1      | B&R@D2      | B&R@D3      | B&R@D4      | B&R@D5      | B&R@D6      | B@D         | R@D         | D&B         | D&R         |
|------------------------------------------|-------------|-------------|-------------|-------------|-------------|-------------|-------------|-------------|-------------|-------------|
| $\rho_{\text{BPEA}} / \text{g mL}^{-1}$  | 0.516±0.002 | 0.844±0.003 | 0.762±0.002 | 1.090±0.006 | 0.729±0.004 | 1.662±0.005 | 4.085±0.006 |             | 0.434±0.002 |             |
| $\rho_{\text{Rh6G}} / \text{g mL}^{-1}$  | 0.523±0.001 | 0.476±0.002 | 1.063±0.004 | 0.874±0.005 | 1.521±0.005 | 1.778±0.003 |             | 1.949±0.004 |             | 0.429±0.002 |
| $m_{\text{samples}} / \text{g}$          | 0.015       | 0.015       | 0.015       | 0.015       | 0.015       | 0.015       | 0.015       | 0.015       |             |             |
| $M_{\text{BPEA}} / \text{g mol}^{-1}$    | 378         | 378         | 378         | 378         | 378         | 378         | 378         |             | 378         |             |
| $M_{\text{Rh6G}} / \text{g mol}^{-1}$    | 479         | 479         | 479         | 479         | 479         | 479         |             | 479         |             | 479         |
| $M_{\text{samples}} / \text{g mol}^{-1}$ | 2187        | 2175        | 2254        | 2340        | 2254        | 2497        | 2234        | 2448        | 2240        | 2240        |
| $X_{\text{BPEA}} / \%$                   | 0.10%       | 0.16%       | 0.15%       | 0.22%       | 0.14%       | 0.37%       | 0.8%        |             | 0.09%       |             |
| $X_{\text{Rh6G}} / \%$                   | 0.08%       | 0.07%       | 0.17%       | 0.14%       | 0.24%       | 0.31%       |             | 0.33%       |             | 0.07%       |

The calculations of  $\rho_{\text{Rh6G}}$  and  $\rho_{\text{BPEA}}$  are based on standard absorbance curves for Rh6G and BPEA acidic solutions, respectively (Fig. S6).

Calculation of  $M_{\text{samples}}$  is based on TGA curves by using  $\text{Zr}_6\text{O}_{12}$  {six  $\text{ZrO}_2$  vs.  $[\text{Zr}_6\text{O}_4(\text{OH})_4\text{L}_6]_n$ } as residue (Fig. S7).

$$X_{\text{BPEA}} = n_{\text{BPEA}} / n_{\text{samples}} = (m_{\text{BPEA}} / M_{\text{BPEA}}) / (m_{\text{samples}} / M_{\text{samples}}).$$

$$X_{\text{Rh6G}} = n_{\text{Rh6G}} / n_{\text{samples}} = (m_{\text{Rh6G}} / M_{\text{Rh6G}}) / (m_{\text{samples}} / M_{\text{samples}}).$$

Interpretation: The formula is to calculate the molar percentage of dyes in the composites (B&R@D, B@D, R@D). X = the molar percentage of dyes in the composites (B&R@D, B@D, R@D); n = amount of substance; m = mass; M = molar mass; BPEA = 9,10-bis(phenylethynyl)anthracene; Rh6G = rhodamine 6G; samples = MOF composites.



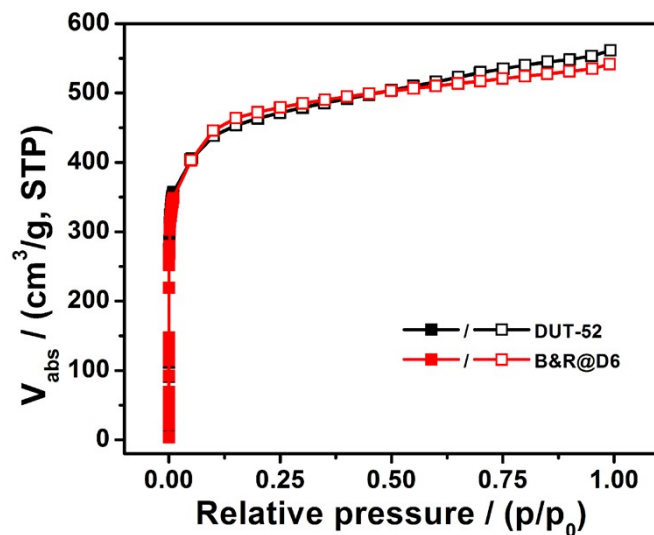

**Fig. S8** N<sub>2</sub> adsorption-desorption isotherms of DUT-52 and B&R@D6 at 77 K.

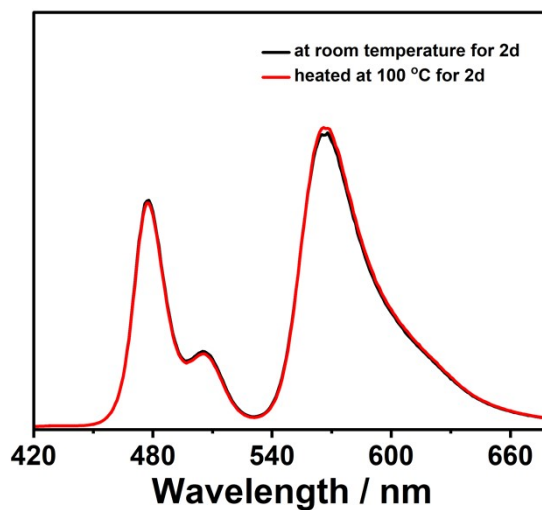

**Fig. S9** Fluorescence spectra of a mixed solution of BPEA and Rh6G (6.275 mg mL<sup>-1</sup> and 11.9 mg mL<sup>-1</sup>, DMF solvent) before and after a solvothermal reaction.

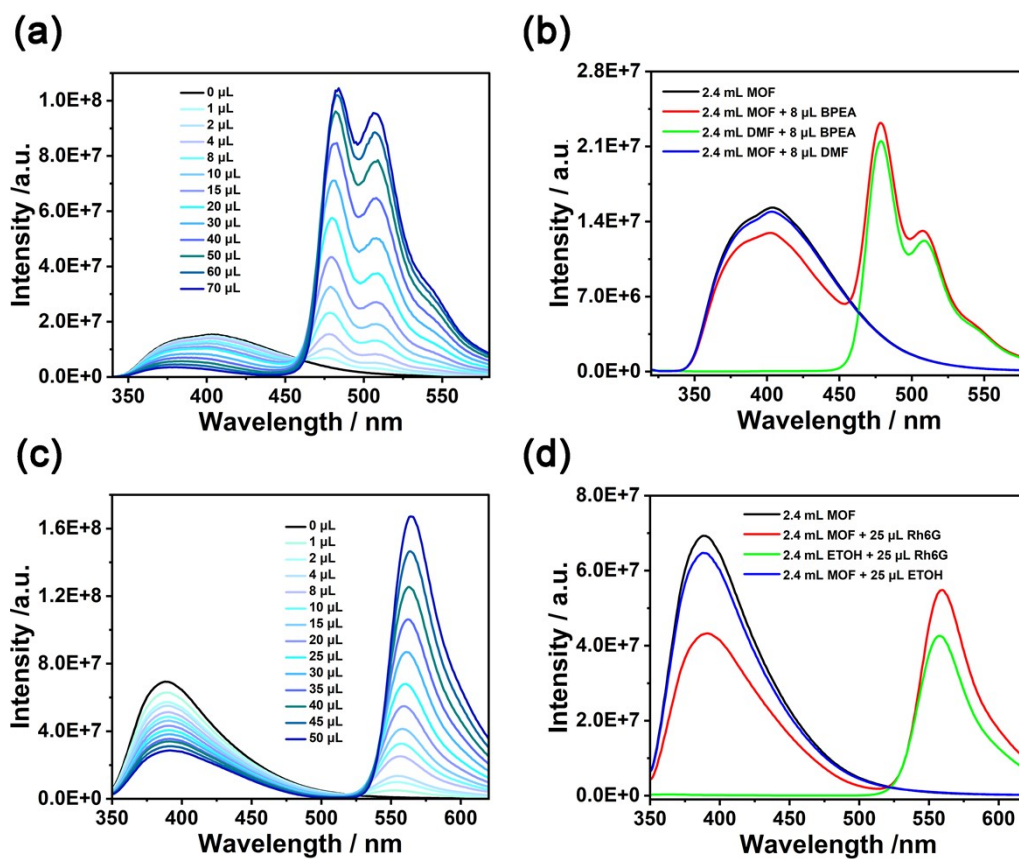

**Fig. S10** (a) Fluorescence response of DUT-52 DMF suspension (2.4 mL) by gradually adding BPEA DMF solution (0.1 g L<sup>-1</sup>). (b) Fluorescence spectra of the controlled experiments. (c) Fluorescence response of DUT-52 ethanol suspension (2.4 mL) by gradually adding Rh6G ethanol solution of (0.1 g L<sup>-1</sup>). (d) Fluorescence spectra of the controlled experiments.

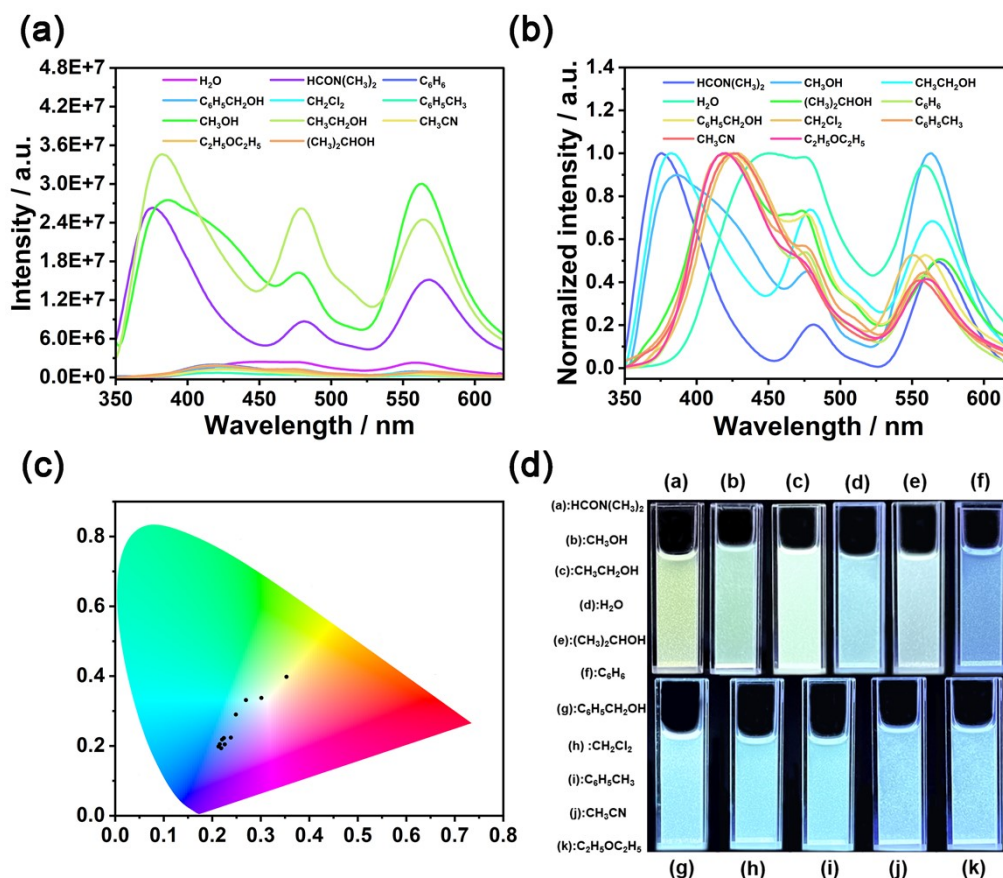

**Fig. S11** (a) Fluorescent spectra of B&R@D6 composites at different solvent ( $\lambda_{\text{ex}} = 320$  nm). (b) Normalized fluorescent spectra of B&R@D6 composites at different solvent ( $\lambda_{\text{ex}} = 320$  nm). (c) The corresponding CIE coordinates. (d) Optical photographs of B&R@D6 composites at different solvent ( $\lambda_{\text{ex}} = 365$  nm).

**Table S2** Comparison of BPEA&Rh6G@DUT-52 sensor with other MOF fluorescent sensors for the detection of Fe<sup>3+</sup> ions

|   | MOF                                                                                                                  | Analyte          | $K_{sv}$ (M <sup>-1</sup> ) | LOD (M)               | Sensing method            | Ref.      |
|---|----------------------------------------------------------------------------------------------------------------------|------------------|-----------------------------|-----------------------|---------------------------|-----------|
| 1 | {[ZnL <sub>0.5</sub> (4,4'-bbib)]·3DMF·3H <sub>2</sub> O} <sub>n</sub>                                               | Fe <sup>3+</sup> | 2.43×10 <sup>2</sup>        | -                     | quenching                 | [1]       |
| 2 | {[Zn(ATA)(L)]·H <sub>2</sub> O} <sub>n</sub>                                                                         | Fe <sup>3+</sup> | 0.557×10 <sup>3</sup>       | 3.76×10 <sup>-6</sup> | quenching and colorimetry | [2]       |
| 3 | [Zr <sub>6</sub> O <sub>4</sub> (OH) <sub>8</sub> (H <sub>2</sub> O) <sub>4</sub> (L <sup>1</sup> ) <sub>2</sub> ]·S | Fe <sup>3+</sup> | 2.17×10 <sup>3</sup>        | 3.8×10 <sup>-6</sup>  | quenching                 | [3]       |
| 4 | [Cd(2-bpeb)(sdba)]                                                                                                   | Fe <sup>3+</sup> | 2.86×10 <sup>3</sup>        | -                     | quenching                 | [4]       |
| 5 | Eu(btc)                                                                                                              | Fe <sup>3+</sup> | 2.9×10 <sup>3</sup>         | 3.13×10 <sup>-6</sup> | quenching                 | [5]       |
| 6 | {[Eu(dpc)(2H <sub>2</sub> O)]·(Hbibp) <sub>0.5</sub> } <sub>n</sub>                                                  | Fe <sup>3+</sup> | 3.34×10 <sup>3</sup>        | 2.89×10 <sup>-6</sup> | quenching                 | [6]       |
| 7 | BPEA&Rh6G@DUT-52                                                                                                     | Fe <sup>3+</sup> | 3.09×10 <sup>3</sup>        | 2.8×10 <sup>-6</sup>  | quenching and colorimetry | This work |

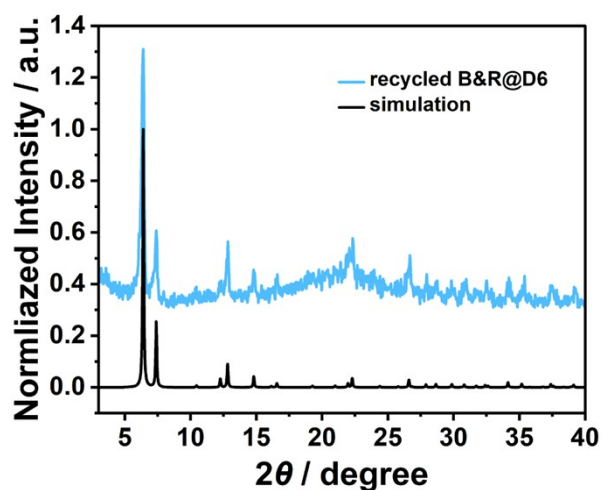

**Fig. S12** PXR D patterns of the recycled B&R@D6 composite.

**Table S3** Comparison of BPEA&Rh6G@DUT-52 sensor with other MOF fluorescent sensors for the detection of  $\text{Cr}_2\text{O}_7^{2-}$  ions

|   | MOF                                                                                       | Analyte                      | $K_{sv}$ ( $\text{M}^{-1}$ ) | LOD (M)               | Sensing method            | Ref.      |
|---|-------------------------------------------------------------------------------------------|------------------------------|------------------------------|-----------------------|---------------------------|-----------|
| 1 | $\text{Eu}^{3+}$ @UiO-66-CA                                                               | $\text{Cr}_2\text{O}_7^{2-}$ | $4.698 \times 10^5$          | $8.5 \times 10^{-6}$  | quenching                 | [7]       |
| 2 | SQDs@UiO-66- $\text{NH}_2$                                                                | $\text{Cr}_2\text{O}_7^{2-}$ | $3.12 \times 10^4$           | $0.16 \times 10^{-6}$ | quenching and colorimetry | [8]       |
| 3 | $[\text{Cd}_3(\text{cpota})_2(\text{phen})_3]_n \cdot 5n\text{H}_2\text{O}$               | $\text{Cr}_2\text{O}_7^{2-}$ | $1.21 \times 10^4$           | $0.37 \times 10^{-6}$ | quenching                 | [9]       |
| 4 | $[\text{Zn}(\text{dptz})(\text{BDC})(\text{H}_2\text{O})]_n$                              | $\text{Cr}_2\text{O}_7^{2-}$ | $1.26 \times 10^4$           | $0.36 \times 10^{-6}$ | quenching                 | [10]      |
| 5 | $[\text{Zn}_2(\text{tpeb})(\text{bpdc})_2] \cdot 0.5\text{DMA} \cdot 4\text{H}_2\text{O}$ | $\text{Cr}_2\text{O}_7^{2-}$ | $1.122 \times 10^4$          | $1.04 \times 10^{-6}$ | quenching                 | [11]      |
| 6 | Cd(II)-MOF                                                                                | $\text{Cr}_2\text{O}_7^{2-}$ | $2.45 \times 10^4$           | 4.88 ppb              | quenching                 | [12]      |
| 7 | BPEA&Rh6G@DUT-52                                                                          | $\text{Cr}_2\text{O}_7^{2-}$ | $4.68 \times 10^5$           | $18.5 \times 10^{-9}$ | quenching and colorimetry | This work |

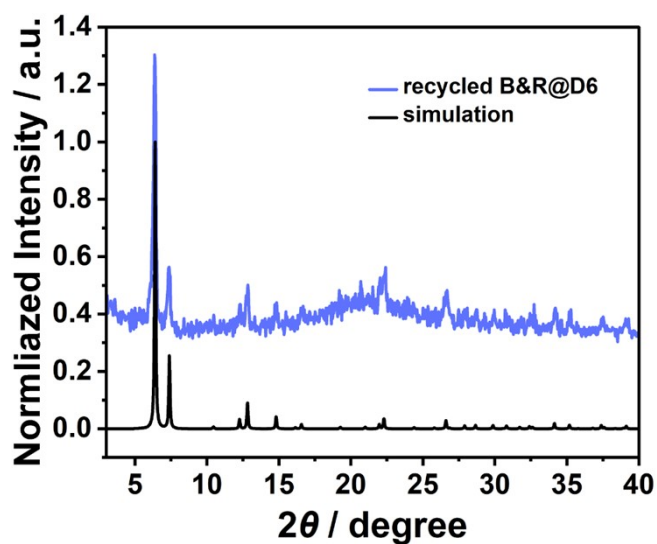

**Fig. S13** PXRD patterns of the recycled B&R@D6 composite.

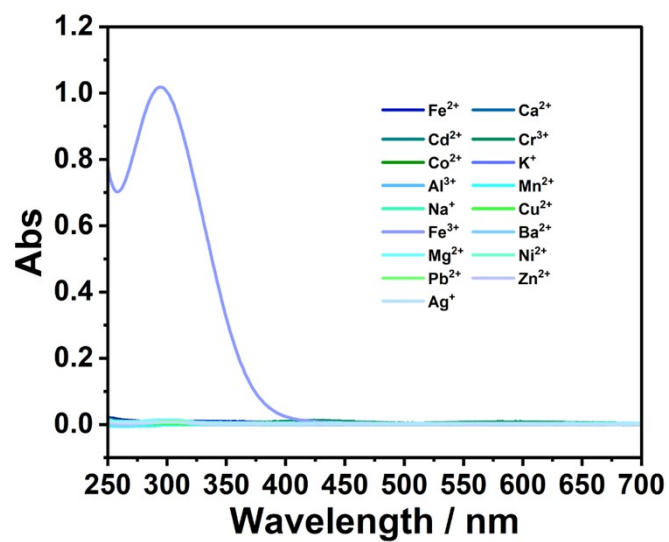

**Fig. S14** The UV-vis absorption spectra of 17 cations in aqueous solution (0.5 mM).

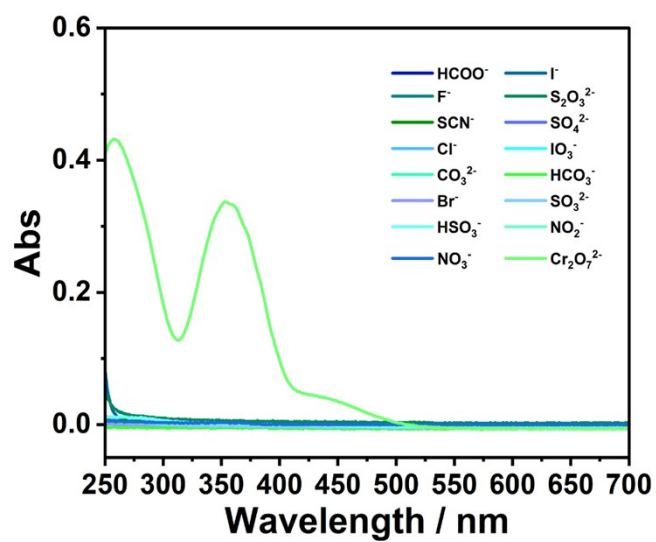

**Fig. S15** The UV-vis absorption spectra of 16 anions in aqueous solution (0.1 mM).

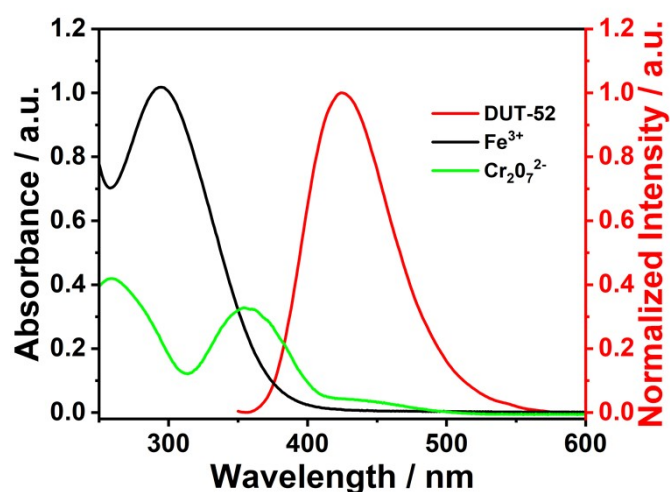

**Fig. S16** Absorption spectra of Fe<sup>3+</sup> (0.5 mM), Cr<sub>2</sub>O<sub>7</sub><sup>2-</sup> (0.1 mM) and normalized emission spectra of DUT-52 in the solid state.

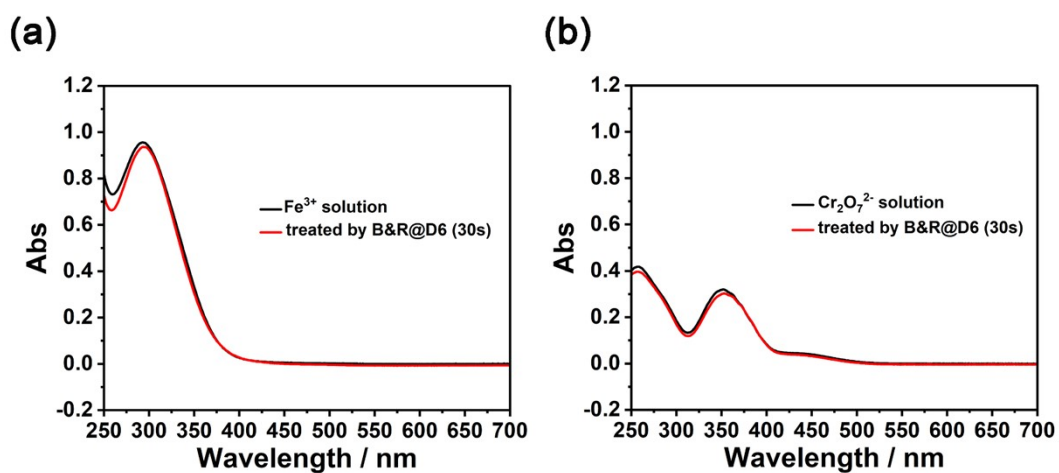

**Fig. S17** Adsorption tests of B&R@D6 composites toward (a) Fe<sup>3+</sup> (0.5 mM) and (b) Cr<sub>2</sub>O<sub>7</sub><sup>2-</sup> (0.1 mM) in sensing process.

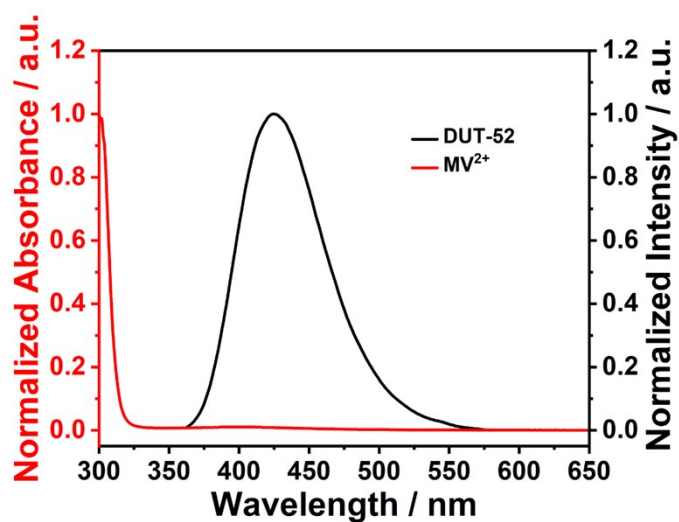

**Fig. S18** Normalized of emission spectra of DUT-52 in solid state (black) and absorption spectra of MV<sup>2+</sup> aqueous solution (red, 0.01 M).

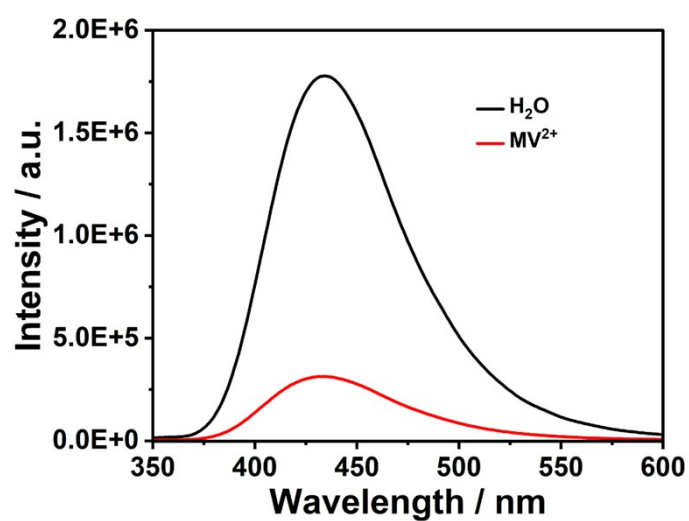

**Fig. S19** Fluorescence response of DUT-52 aqueous suspension by adding MV<sup>2+</sup> aqueous solution (0.01 M).



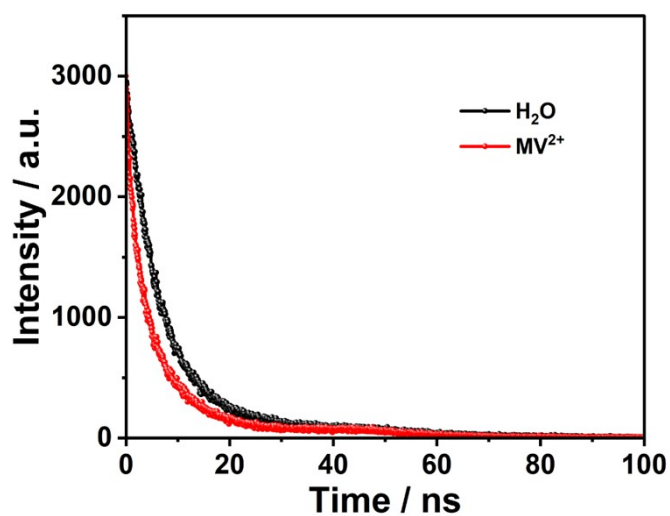

**Fig. S20** Luminescence decay curves of DUT-52 aqueous suspension and  $MV^{2+}$  aqueous solution (0.01M).

**Table S4** Detection of  $Fe^{3+}$  concentration in actual water samples

| Sample                            | Spiked ( $\mu M$ ) | Found ( $\mu M$ ) | Recovery (%) | RSD (%) (n = 3) |
|-----------------------------------|--------------------|-------------------|--------------|-----------------|
| Songhua River (China. Harbin)     | 25.00              | 25.38 $\pm$ 0.09  | 101.5        | 0.34            |
|                                   | 50.00              | 52.30 $\pm$ 0.15  | 104.6        | 0.29            |
|                                   | 75.00              | 78.53 $\pm$ 0.08  | 104.7        | 0.36            |
| Majiagou Lake (China. Harbin)     | 25.00              | 26.98 $\pm$ 0.05  | 107.9        | 0.19            |
|                                   | 50.00              | 56.25 $\pm$ 0.15  | 112.5        | 0.27            |
|                                   | 75.00              | 85.58 $\pm$ 0.06  | 114.1        | 0.07            |
| Tap water for Northeast Forestry  | 25.00              | 25.43 $\pm$ 0.05  | 101.7        | 0.18            |
| University campus (China. Harbin) | 50.00              | 52.40 $\pm$ 0.09  | 104.8        | 0.17            |
|                                   | 75.00              | 79.20 $\pm$ 0.04  | 105.6        | 0.36            |

**Table S5** Detection of  $\text{Cr}_2\text{O}_7^{2-}$  concentration in actual water samples

| Sample                            | Spiked ( $\mu\text{M}$ ) | Found ( $\mu\text{M}$ ) | Recovery (%) | RSD (%) (n = 3) |
|-----------------------------------|--------------------------|-------------------------|--------------|-----------------|
| Songhua River (China. Harbin)     | 5.00                     | 5.02±0.02               | 100.3        | 0.39            |
|                                   | 10.00                    | 9.71±0.02               | 97.1         | 0.21            |
|                                   | 15.00                    | 14.13±0.02              | 94.2         | 0.11            |
| Majiagou Lake (China. Harbin)     | 5.00                     | 5.01±0.01               | 100.1        | 0.12            |
|                                   | 10.00                    | 8.86±0.02               | 88.6         | 0.29            |
|                                   | 15.00                    | 13.02±0.01              | 86.8         | 0.06            |
| Tap water for Northeast Forestry  | 5.00                     | 4.70±0.01               | 94.0         | 0.21            |
| University campus (China. Harbin) | 10.00                    | 9.26±0.03               | 92.6         | 0.37            |
|                                   | 15.00                    | 13.98±0.05              | 93.2         | 0.33            |

## References

- [1] H.N. Wu, L.L. Gao, J. Zhang, L.J. Zhai, T. Gao, X.Y. Niu and T.P. Hu, *J. Mol. Struct.*, 2020, **1219**, 128613.
- [2] B. Parmar, Y. Rachuri, K.K. Bisht and E. Suresh, *Inorg. Chem.*, 2017, **56**, 10939-10949.
- [3] B. Wang, Q. Yang, C. Cuo, Y.X. Sun, L.-H. Xie and J.-R. Li, *ACS Appl. Mater. Interfaces*, 2017, **9**, 10286-10295.
- [4] K. Chen, R. Li, Y.-Y. Peng, Z.-Q. Cai, Z.-Y. Hua, X.-D. Zhang, C. Redshaw and Y. Zhao, *Inorg. Chem. Commun.*, 2020, **121**, 108259.
- [5] J.L. Peng, W. Zhou, H.P. Ding, H.H. Du and S.J.J. Li, *J. Rare Earths*, 2021, **39**, 446-452.
- [6] Y. Du, H.Y. Yang, R.J. Liu, C.Y. Shao and L.R. Yang, *Dalton. T.*, 2020, **49**, 13003-13016.
- [7] Y. Fan, X.Q. Sun, W.Y. Zhang and J.C. Liu, *Colloids Surfaces A.*, 2023, **669**, 131513.
- [8] Y.Q. Zhang, J.X. Liu, X.H. Wu, W.Q. Tao and Z. Li, *Anal. Chim. Acta.*, 2020, **1131**, 68-79.
- [9] S.D. Li, L.P. Lu, M.L. Zhu, C.X. Yuan and S.S. Feng, *Sens. Actuators B Chem.*, 2018, **258**, 970-980.
- [10] J.-C. Yin, N. Li, B.-B. Qian, M.-H. Yu, Z. Chang and X.-H. Bu, *J. Coord. Chem.*, 2020, **73**, 2718-2727.
- [11] B.B. Rath and J.J. Vittal, *Inorg. Chem.*, 2020, **59**, 8818-8826.

[12] L.-H. Chen, X.-B. Cai, Q. Li, B.-B. Guan, T.-H. Liu, D. Li, Z.-Q. Wu and W.

Zhu, *J. Solid State Chem.*, 2021, **302**, 122416.
